# Supplementary material for: G Protein-Coupled Receptors in Taste Physiology and Pharmacology
Source: PubMed Central journal article supplement (PMC7774309; doi:10.3389/fphar.2020.587664), 2020-11-30
Supplement: table1.pdf [file table1.pdf]

**Supplementary table 1.** Bitter receptors and their ligands with their half maximal effective conc. (EC50) values

| Agonists            |        |   |     |   |   |   |   |     |    |       | hTAS2R<br>(mM) |       |       |        |       |      |       |        |    |     | Ref.                                                              |
|---------------------|--------|---|-----|---|---|---|---|-----|----|-------|----------------|-------|-------|--------|-------|------|-------|--------|----|-----|-------------------------------------------------------------------|
| Receptors           | 1      | 3 | 4   | 5 | 7 | 8 | 9 | 10  | 13 | 14    | 16             | 38    | 39    | 40     | 43    | 44   | 46    | 47     | 49 | 50  |                                                                   |
| Absinthin           |        |   |     |   |   |   |   | 0.1 |    | 0.1   |                |       |       |        |       |      | 0.001 | 0.0001 |    |     | Cowart et al., 1994; Meyerhof et al., 2010; Talmon et al., 2019   |
| Adhumulone          | 0.0001 |   |     |   |   |   |   |     |    |       |                |       |       | 0.0003 |       |      |       |        |    |     | Intelmann et al., 2009                                            |
| Aesculin            |        |   |     |   |   |   |   |     |    |       | 4              |       |       |        |       |      |       |        |    |     | Bufe et al., 2002                                                 |
| Acesulfame K        |        |   |     |   |   |   |   |     |    |       |                |       |       |        | 4.7   | 0.34 |       |        |    |     | Meyerhof et al., 2010                                             |
| Acetaminophen       |        |   |     |   |   |   |   |     |    |       |                |       | 3     |        |       |      |       |        |    |     | Rodgers et al., 2006; Dotson, et al., 2008; Meyerhof et al., 2010 |
| Acetylgenistin      |        |   |     |   |   |   |   |     |    |       |                |       | 0.125 |        |       |      |       |        |    |     | Roland et al., 2013                                               |
| Acetylthiourea      |        |   |     |   |   |   |   |     |    |       |                | 0.003 |       |        |       |      |       |        |    |     | Meyerhof et al., 2010                                             |
| Adlupulone          | 0.001  |   |     |   |   |   |   |     |    | 0.003 |                |       |       |        |       |      |       |        |    |     | Intelmann et al., 2009                                            |
| Aloin               |        |   |     |   |   |   |   |     |    |       |                |       |       |        | 0.003 | 0.03 |       |        |    |     | Meyerhof et al., 2010                                             |
| Allylisothiocyanate |        |   |     |   |   |   |   |     |    |       |                | 0.01  |       |        |       |      |       |        |    |     | Meyerhof et al., 2010                                             |
| Amarogentin         | 0.03   |   | 0.3 |   |   |   |   |     |    |       |                |       |       |        | 0.03  |      | 0.01  | 0.003  |    | 0.1 | Glendinning, 1994; Meyer                                          |



|                   |        |      |      |  |     |      |  |      |        |     |     |       |        |     |      |       |  |  |                                                                                   |
|-------------------|--------|------|------|--|-----|------|--|------|--------|-----|-----|-------|--------|-----|------|-------|--|--|-----------------------------------------------------------------------------------|
| Caffeine          |        |      |      |  | 0.3 |      |  | 0.3  |        | 0.3 |     |       |        |     | 0.3  |       |  |  | Burdock, 2005; Rodgers et al., 2006; Intelmann et al., 2009; Guinard et al., 1994 |
| Chrysin           |        |      |      |  |     |      |  |      | 0.063  |     |     | 0.016 |        |     |      |       |  |  | Roland et al., 2011                                                               |
| D-camphor         |        |      | 0.3  |  |     |      |  | 0.3  | 0.003  |     |     |       |        |     |      | 0.3   |  |  | Meyerhof et al., 2010; Burdock., 2005                                             |
| Caprolactam       |        |      |      |  |     |      |  |      |        |     | 10  |       |        |     |      |       |  |  | Meyerhof et al., 2010                                                             |
| Carisoprodol      |        |      |      |  |     |      |  |      | 0.1    |     |     |       |        |     | 0.01 |       |  |  | Meyerhof et al., 2010                                                             |
| Cascarillin       | 0.1    |      |      |  |     |      |  | 0.1  | 0.1    |     |     |       |        |     | 0.01 | 0.1   |  |  | Meyerhof et al., 2010                                                             |
| Chalcone          |        |      |      |  |     |      |  |      | 0.032  |     |     |       |        |     |      |       |  |  | Roland et al., 2011                                                               |
| Chloramphenicol   | 0.1    |      |      |  |     | 0.03 |  | 0.1  |        |     |     | 1     |        | 0.1 |      | 0.01  |  |  | Meyerhof et al., 2010                                                             |
| Chlorhexidine     |        |      |      |  |     |      |  |      | 0.0001 |     |     |       |        |     |      |       |  |  | Meyerhof et al., 2010                                                             |
| Chloropheniramine |        |      | 0.03 |  |     | 0.01 |  | 0.01 | 0.1    |     | 0.1 | 0.1   | 0.1    |     |      | 0.1   |  |  | Meyerhof et al., 2010                                                             |
| Chloroquine       |        | 0.01 |      |  |     |      |  | 10   | 0.01   |     |     | 0.1   |        |     |      |       |  |  | Meyerhof et al., 2010                                                             |
| Clonixin          |        |      |      |  |     |      |  |      | 0.002  |     |     |       |        |     |      |       |  |  | Levit et al., 2014                                                                |
| Cnicin            |        |      |      |  |     |      |  |      |        |     |     |       |        |     |      | 0.003 |  |  | Meyerhof et al., 2010                                                             |
| Colchicine        |        |      | 0.1  |  |     |      |  |      |        |     |     | 3     |        |     |      | 0.3   |  |  | Meyerhof et al., 2010                                                             |
| Colupulone        | 0.0001 |      |      |  |     |      |  |      |        |     |     |       | 0.0003 |     |      |       |  |  | Intelmann et al., 2009                                                            |





|                        |      |  |  |  |  |     |  |        |  |       |  |  |     |       |  |  |     |  |                                                        |
|------------------------|------|--|--|--|--|-----|--|--------|--|-------|--|--|-----|-------|--|--|-----|--|--------------------------------------------------------|
| N,N'-ethylene thiourea |      |  |  |  |  |     |  |        |  |       |  |  |     |       |  |  |     |  |                                                        |
| Falcarindiol           |      |  |  |  |  |     |  | 0.1    |  |       |  |  |     | 0.1   |  |  |     |  | Meyerhof et al., 2010                                  |
| Famotidine             |      |  |  |  |  | 0.3 |  |        |  |       |  |  |     |       |  |  | 0.3 |  | Meyerhof et al., 2010                                  |
| Fisetin                |      |  |  |  |  |     |  |        |  | 0.001 |  |  |     |       |  |  |     |  | Roland et al., 2013                                    |
| Formomonetin           |      |  |  |  |  |     |  | 0.5    |  | 0.5   |  |  |     |       |  |  |     |  | Roland et al., 2013                                    |
| Flavone                |      |  |  |  |  |     |  | 0.008  |  | 0.008 |  |  |     |       |  |  |     |  | Roland et al., 2013                                    |
| Flavanone              |      |  |  |  |  |     |  | 0.032  |  |       |  |  |     |       |  |  |     |  | Roland et al., 2013                                    |
| Flufenamic acid        |      |  |  |  |  |     |  | 0.0001 |  |       |  |  |     |       |  |  |     |  | Meyerhof et al., 2010; Di Pizio et al., 2020           |
| Fustin                 |      |  |  |  |  |     |  | 0.5    |  | 0.25  |  |  |     |       |  |  |     |  | Roland et al., 2013                                    |
| Genistin               |      |  |  |  |  |     |  | 0.004  |  | 0.25  |  |  |     |       |  |  |     |  | Roland et al., 2011; Drewnowski & Gomez-Carneros, 2000 |
| Genkwanin              |      |  |  |  |  |     |  |        |  | 0.5   |  |  |     |       |  |  |     |  | Roland et al., 2013                                    |
| Gossypetin             |      |  |  |  |  |     |  |        |  | 0.25  |  |  |     |       |  |  |     |  | Roland et al., 2013                                    |
| Grosshemin             |      |  |  |  |  |     |  |        |  |       |  |  | 0.1 | 0.001 |  |  |     |  | Meyerhof et al., 2010                                  |
| Glycitein              |      |  |  |  |  |     |  | 0.5    |  | 0.5   |  |  |     |       |  |  |     |  | Roland et al., 2013                                    |
| Gly-leu                | 100  |  |  |  |  |     |  |        |  |       |  |  |     |       |  |  |     |  | Maehashi et al., 2008                                  |
| Gly-phe                | 57.5 |  |  |  |  |     |  |        |  |       |  |  |     |       |  |  |     |  | Maehashi et al., 2008;                                 |



|                   |        |  |   |  |  |  |  |  |  |        |  |      |       |  |  |  |  |  |  |  |                                                                                 |
|-------------------|--------|--|---|--|--|--|--|--|--|--------|--|------|-------|--|--|--|--|--|--|--|---------------------------------------------------------------------------------|
| Cis-isocohumulone | 0.001  |  |   |  |  |  |  |  |  | 0.001  |  |      |       |  |  |  |  |  |  |  | Intelmann et al., 2009                                                          |
| Cis-isohumulone   | 0.0003 |  |   |  |  |  |  |  |  | 0.0003 |  |      |       |  |  |  |  |  |  |  | Intelmann et al., 2009                                                          |
| Kaempferol        |        |  |   |  |  |  |  |  |  | 0.008  |  |      | 0.014 |  |  |  |  |  |  |  | Roland et al., 2013; Levit et al., 2014                                         |
| Limonin           |        |  |   |  |  |  |  |  |  |        |  | 0.1  |       |  |  |  |  |  |  |  | Meyerhof et al., 2010; Drewnowski, & Gomez-Carneros, 2000; Guinard et al., 1994 |
| Liquiritigenin    |        |  |   |  |  |  |  |  |  | 0.032  |  |      | 0.016 |  |  |  |  |  |  |  | Roland et al., 2013                                                             |
| Leu-trp           | 3      |  | 3 |  |  |  |  |  |  |        |  |      | 3     |  |  |  |  |  |  |  | Kohl et al., 2013                                                               |
| Leu-leu-leu       |        |  | 3 |  |  |  |  |  |  |        |  |      |       |  |  |  |  |  |  |  | Kohl et al., 2013                                                               |
| Liquiritigenin    |        |  |   |  |  |  |  |  |  | 0.032  |  |      | 0.016 |  |  |  |  |  |  |  | Roland et al., 2013                                                             |
| Lupulon           | 0.0001 |  |   |  |  |  |  |  |  | 0.003  |  |      |       |  |  |  |  |  |  |  | Intelmann et al., 2009                                                          |
| Luteolin          |        |  |   |  |  |  |  |  |  | 0.002  |  |      |       |  |  |  |  |  |  |  | Roland et al., 2013                                                             |
| Malathion         |        |  |   |  |  |  |  |  |  | 0.05   |  |      |       |  |  |  |  |  |  |  | Levit et al., 2014                                                              |
| Mefenamic acid    |        |  |   |  |  |  |  |  |  | 0.003  |  |      |       |  |  |  |  |  |  |  | Levit et al., 2014; Ayenew et al., 2009; Alshehri et al., 2015                  |
| Methimazole       |        |  |   |  |  |  |  |  |  |        |  | 0.03 |       |  |  |  |  |  |  |  | Meyerhof et al., 2010                                                           |



|                                       |  |  |  |      |     |      |  |       |     |     |       |  |  |  |      |  |  |  |                                             |
|---------------------------------------|--|--|--|------|-----|------|--|-------|-----|-----|-------|--|--|--|------|--|--|--|---------------------------------------------|
| 4(6)-methyl-2-thiouracil              |  |  |  |      |     |      |  |       |     |     | 0.03  |  |  |  |      |  |  |  | Meyerhof et al., 2010                       |
| Methyl beta-D-glucoside               |  |  |  |      |     |      |  |       | 15  |     |       |  |  |  |      |  |  |  | Bufe et al., 2002                           |
| Methylthiourea                        |  |  |  |      |     |      |  |       |     |     | 0.1   |  |  |  |      |  |  |  | Dotson et al., 2008; Meyerhof et al., 2010  |
| Miconazole                            |  |  |  |      |     |      |  | 0.033 |     |     |       |  |  |  |      |  |  |  | Levit et al., 2014                          |
| Morin                                 |  |  |  |      |     |      |  | 0.008 |     |     | 0.002 |  |  |  |      |  |  |  | Roland et al., 2013                         |
| Myricetin                             |  |  |  |      |     |      |  | 0.25  |     |     | 0.001 |  |  |  |      |  |  |  | Roland et al., 2013                         |
| 1-Naphthoic acid                      |  |  |  |      |     |      |  | 0.003 |     |     |       |  |  |  |      |  |  |  | Behrens et al., 2004                        |
| 2-Naphthyl beta-D-glucopyranoside     |  |  |  |      |     |      |  |       | 0.4 |     |       |  |  |  |      |  |  |  | Bufe et al., 2002                           |
| 2-nitro phenyl beta-D-glucopyranoside |  |  |  |      |     |      |  |       | 1.5 |     |       |  |  |  |      |  |  |  | Bufe et al., 2002                           |
| 6-Nitrosaccharin                      |  |  |  |      |     |      |  |       |     | 0.1 |       |  |  |  |      |  |  |  | Hamor, 1961                                 |
| Noscapine                             |  |  |  |      |     |      |  | 0.01  |     |     |       |  |  |  |      |  |  |  | Meyerhof et al., 2010                       |
| Ofloxacin                             |  |  |  |      | 0.2 |      |  |       |     |     |       |  |  |  |      |  |  |  | Dotson et al., 2008                         |
| Orphenadrine                          |  |  |  |      |     |      |  |       |     |     |       |  |  |  | 0.03 |  |  |  | Meyerhof et al., 2010                       |
| Pantoprazole                          |  |  |  |      |     |      |  | 0.1   |     |     |       |  |  |  |      |  |  |  | Levit et al., 2014                          |
| Papaverine                            |  |  |  | 0.01 |     | 0.01 |  | 0.01  |     |     |       |  |  |  |      |  |  |  | Meyerhof et al., 2010; Guinard et al., 1994 |

|                               |             |  |      |       |  |     |  |      |       |      |  |        |  |  |     |       |   |  |                                            |
|-------------------------------|-------------|--|------|-------|--|-----|--|------|-------|------|--|--------|--|--|-----|-------|---|--|--------------------------------------------|
| Pemirolast                    |             |  |      |       |  |     |  |      | 0.005 |      |  |        |  |  |     |       |   |  | Levit et al., 2014                         |
| Parthenolide                  | 0.1         |  | 0.03 |       |  | 0.1 |  | 0.03 | 0.003 |      |  |        |  |  | 0.1 | 0.001 |   |  | Meyerhof et al., 2010                      |
| Pelargonidin chloride         |             |  |      |       |  |     |  |      | 0.063 |      |  | 0.032  |  |  |     |       |   |  | Roland et al., 2013                        |
| Pentagalloylglucose (PGG)     |             |  |      | 0.003 |  |     |  |      |       |      |  | 0.003  |  |  |     |       |   |  | Soares et al., 2013                        |
| Phloretin                     |             |  |      |       |  |     |  |      | 0.016 |      |  | 0.008  |  |  |     |       |   |  | Roland et al., 2013                        |
| Picrotin                      |             |  |      |       |  |     |  |      | 0.03  |      |  |        |  |  |     |       |   |  | Behrens et al., 2004                       |
| Picrotoxinin                  | 1           |  |      |       |  |     |  | 1    | 0.003 |      |  |        |  |  |     | 0.01  | 1 |  | Meyerhof et al., 2010                      |
| Pinoembrin                    |             |  |      |       |  |     |  |      | 0.008 |      |  | 0.004  |  |  |     |       |   |  | Roland et al., 2013                        |
| Piperonylic acid              |             |  |      |       |  |     |  |      | 0.1   |      |  |        |  |  |     |       |   |  | Behrens et al., 2004                       |
| 1,10-phenanthroline           |             |  |      | 0.1   |  |     |  |      |       |      |  |        |  |  |     |       |   |  | Meyerhof et al., 2010                      |
| Phenyl beta-D-glucopyranoside |             |  |      |       |  |     |  |      |       | 0.38 |  |        |  |  |     |       |   |  | Sakurai et al., 2010; Bufe et al., 2002    |
| Phe-leu                       | 7.2 (EC50)  |  |      |       |  |     |  |      |       |      |  |        |  |  |     |       |   |  | Upadhyaya et al., 2010                     |
| L-phenylalanine               | 53.3        |  |      |       |  |     |  |      |       |      |  |        |  |  |     |       |   |  | Kohl et al., 2013; Burdock, 2005           |
| Phe-trp                       | 1           |  |      | 1     |  |     |  |      |       |      |  |        |  |  |     |       |   |  | Kohl et al., 2013                          |
| Phe-phe-phe                   | 0.37 (EC50) |  |      |       |  |     |  |      |       |      |  |        |  |  |     |       |   |  | Upadhyaya et al., 2010                     |
| phenylethyl isothiocyanate    |             |  |      |       |  |     |  |      |       |      |  | 0.03   |  |  |     |       |   |  | Meyerhof et al., 2010                      |
| Phenylthiocarbamide (PTC)     |             |  |      |       |  |     |  |      |       |      |  | 0.0004 |  |  |     |       |   |  | Dotson et al., 2008; Meyerhof et al., 2010 |





|                     |        |  |    |  |  |  |  |       |       |  |  |       |  |  |  |       |  |  |                                               |
|---------------------|--------|--|----|--|--|--|--|-------|-------|--|--|-------|--|--|--|-------|--|--|-----------------------------------------------|
| Strychnine          |        |  |    |  |  |  |  | 0.003 |       |  |  |       |  |  |  | 0.001 |  |  | Meyerhof et al., 2010                         |
| Sucrose Octaacetate |        |  |    |  |  |  |  |       |       |  |  |       |  |  |  | 0.3   |  |  | Burdock, 2005; Meyerhof et al., 2010          |
| Sulfuretin          |        |  |    |  |  |  |  |       | 0.016 |  |  | 0.016 |  |  |  |       |  |  | Roland et al., 2013                           |
| Tatridin A          |        |  |    |  |  |  |  |       |       |  |  |       |  |  |  | 0.03  |  |  | Brockhoff et al., 2007                        |
| Tatridin B          |        |  |    |  |  |  |  |       |       |  |  |       |  |  |  | 0.1   |  |  | Brockhoff et al., 2007; Meyerhof et al., 2010 |
| (+)- Taxifolin      |        |  |    |  |  |  |  |       | 0.063 |  |  | 0.125 |  |  |  |       |  |  | Roland et al., 2013; Intelmann et al., 2009   |
| Teuflavin           |        |  |    |  |  |  |  |       |       |  |  |       |  |  |  | 0.03  |  |  | Brockhoff et al., 2007                        |
| Thiamine            | 1      |  |    |  |  |  |  |       |       |  |  | 1     |  |  |  |       |  |  | Meyerhof et al., 2010                         |
| Theobromine         |        |  |    |  |  |  |  |       | 1     |  |  |       |  |  |  |       |  |  | Burdock, 2005; Guinard et al., 1994           |
| Trans-isoadhumulone | 0.0003 |  |    |  |  |  |  |       | 0.001 |  |  |       |  |  |  |       |  |  | Intelmann et al., 2009                        |
| Trans-isocohumulone | 0.001  |  |    |  |  |  |  |       | 0.001 |  |  |       |  |  |  |       |  |  | Intelmann et al., 2009                        |
| Trans-isohumulone   | 0.0003 |  |    |  |  |  |  |       | 0.001 |  |  |       |  |  |  |       |  |  | Intelmann et al., 2009                        |
| L-tryptophan        |        |  | 10 |  |  |  |  |       |       |  |  |       |  |  |  |       |  |  | Kohl et al., 2013; Sonntag et al., 2010       |

|                          |       |  |      |  |  |  |     |  |       |  |  |      |       |  |  |  |  |  |  |     |                        |
|--------------------------|-------|--|------|--|--|--|-----|--|-------|--|--|------|-------|--|--|--|--|--|--|-----|------------------------|
| Trp-leu                  |       |  | 3    |  |  |  |     |  |       |  |  |      |       |  |  |  |  |  |  |     | Kohl et al., 2013      |
| Trp-phe                  |       |  | 0.3  |  |  |  |     |  |       |  |  |      |       |  |  |  |  |  |  |     | Kohl et al., 2013      |
| Trp-pro                  |       |  | 3    |  |  |  |     |  |       |  |  |      |       |  |  |  |  |  |  |     | Kohl et al., 2013      |
| Trp-trp-trp              | 0.1   |  | 0.01 |  |  |  |     |  | 0.1   |  |  | 0.1  |       |  |  |  |  |  |  |     | Kohl et al., 2013      |
| Trp-trp                  | 0.3   |  | 1    |  |  |  |     |  |       |  |  | 1    |       |  |  |  |  |  |  |     | Kohl et al., 2013      |
| Thujone, (-)- $\alpha$ - |       |  |      |  |  |  | 0.1 |  | 0.003 |  |  |      |       |  |  |  |  |  |  |     | Meyerhof et al., 2010  |
| Tricetin                 |       |  |      |  |  |  |     |  |       |  |  | 0.25 |       |  |  |  |  |  |  |     | Roland et al., 2013    |
| Umbelliferones           |       |  |      |  |  |  |     |  | 0.6   |  |  |      |       |  |  |  |  |  |  |     | Rodgers et al., 2006   |
| Vulgarolide              |       |  |      |  |  |  |     |  |       |  |  |      |       |  |  |  |  |  |  | 0.1 | Brockhoff et al., 2007 |
| Xanthohumol              | 0.001 |  |      |  |  |  |     |  | 0.003 |  |  |      | 0.003 |  |  |  |  |  |  |     | Intelmann et al., 2009 |
| Xanthone                 |       |  |      |  |  |  |     |  | 0.25  |  |  | 0.5  |       |  |  |  |  |  |  |     | Roland et al., 2013    |
| Xanthotoxin              |       |  |      |  |  |  | 0.1 |  | 0.1   |  |  |      |       |  |  |  |  |  |  | 0.1 | Mancuso et al., 2015   |
| Yohimbine                | 0.3   |  | 0.3  |  |  |  | 0.3 |  |       |  |  | 0.3  |       |  |  |  |  |  |  | 0.3 | Meyerhof et al., 2010  |
